# Supplementary material for: Origin of surface reconstruction via oxygen termination and improved hydrogen evolution reactions in MXenes
Source: Royal Society of Chemistry journal article supplement (doi:10.1039/d4ta07462a), 2024-12-03
Supplement: d4ta07462a2.pdf [file d4ta07462a2.pdf]

## Supporting Information

### On the Origin of Surface Reconstruction via Oxygen Termination and Improved Hydrogen Evolution Reaction in MXenes

Kishan H. Mali<sup>a</sup>, Rushikesh Pokar<sup>a</sup> and Alpa Dashora<sup>a\*</sup>

<sup>a</sup>*Department of physics, Faculty of Science, The M.S. University of Baroda, Vadodara, 390002, India*

**\*Corresponding authors:**

Dr. Alpa Dashora

**E-mail:** [dashoralpa@gmail.com](mailto:dashoralpa@gmail.com)

## Contents

### **Supplementary Notes**

Supplementary Note 1: Description of hydrogen adsorption sites

Supplementary Note 2: Calculation of adsorbate-adsorbate interaction parameter using DFT derived cluster energies

Supplementary Note 3: Monte Carlo simulation to Compute the heat of formation

Supplementary Note 4: Zero-point energy calculation using mass weighted hessian matrix

Supplementary Note 5: Additional Computational details

### **References**

### **Supplementary Figures**

Figure S1-S11

### **Supplementary Tables**

Table S1-S5

### **Supplementary Multimedia**

Multimedia S1

## Supplementary Notes

### **Supplementary Note 1: Description of hydrogen adsorption sites**

Screening of the catalyst was done only by considering the ground state configuration of both the termination groups. After determining the ground state configuration for termination groups for all MXenes, we can distribute the MXene in three categories based on the placement of the termination groups as on-top type, fcc type, and hcp type MXene. In figure S2, we have shown three representative cases from each category to understand their structure and available sites for the hydrogen adsorption.

Figure S2 (a-b) is  $\text{Mo}_3\text{C}_2\text{F}_2$ , in which -F is terminated over the top of metal atoms from the upper layer. In this type of MXene, hydrogen adsorption will occur over three sites, as marked in the figure. Since this is on-top terminated MXene hydrogen adsorption over termination atom is on-top adsorption as marked 1, while the 2 and 3 correspond to hydrogen adsorption over the fcc site (over the middle layer metal atom) and hcp site (over the carbon atom). Figure S2 (c-d) shows  $\text{Mo}_3\text{C}_2\text{O}_2$ , in which -O is terminated over the top of the carbon atom (hcp site). In this case, hydrogen adsorption over -O termination would be the same as adsorption over the hcp site. While 2 and 3 markings denote the hydrogen adsorption over the on-top and fcc sites. At last, Figure S2 (e-f) is  $\text{Ti}_3\text{C}_2\text{O}_2$ , in which -O is terminated over the middle layer transition metal atom, also known as the fcc site. In this scenario, hydrogen adsorption over the -O termination would be similar to adsorption over the fcc site as marked as 1, while 2 and 3 correspond to hydrogen adsorption over the on-top site and hcp site, respectively.

### **Supplementary Note 2: Calculation of adsorbate-adsorbate interaction parameter using DFT derived cluster energies**

$$E_* + \left(\mu(O) + E_{ad}^{(O)}\right) + \delta E = E_0 \quad [\text{S1}]$$

$$E_* + 2\left(\mu(O) + E_{ad}^{(O)}\right) + J_{21} + \delta E = E_{21} \quad [\text{S2}]$$

$$E_* + 2\left(\mu(O) + E_{ad}^{(O)}\right) + J_{22} + \delta E = E_{22} \quad [\text{S3}]$$

$$E_* + 2\left(\mu(O) + E_{ad}^{(O)}\right) + J_{23} + \delta E = E_{23} \quad [\text{S4}]$$

$$E_* + 2\left(\mu(O) + E_{ad}^{(O)}\right) + J_{24} + \delta E = E_{24} \quad [\text{S5}]$$

$$E_* + 2\left(\mu(O) + E_{ad}^{(O)}\right) + J_{25} + \delta E = E_{25} \quad [\text{S6}]$$

$$E_* + 3\left(\mu(O) + E_{ad}^{(O)}\right) + 3J_{21} + J_{31} + \delta E = E_{31} \quad [\text{S7}]$$

$$E_* + 3\left(\mu(O) + E_{ad}^{(O)}\right) + 2J_{21} + J_{22} + J_{32} + \delta E = E_{32} \quad [\text{S8}]$$

$$E_* + 3\left(\mu(O) + E_{ad}^{(O)}\right) + 2J_{21} + J_{23} + J_{33} + \delta E = E_{33} \quad [\text{S9}]$$

$$E_* + 3\left(\mu(O) + E_{ad}^{(O)}\right) + 3J_{21} + J_{34} + \delta E = E_{34} \quad [\text{S10}]$$

$$E_* + 3\left(\mu(O) + E_{ad}^{(O)}\right) + J_{21} + J_{22} + J_{24} + J_{35} + \delta E = E_{35} \quad [\text{S11}]$$

$$E_* + 4\left(\mu(O) + E_{ad}^{(O)}\right) + 5J_{21} + J_{22} + J_{31} + 2J_{32} + J_{34} + J_{41} + \delta E = E_{41} \quad [\text{S12}]$$

### Supplementary Note 3: Monte Carlo simulation to Compute the heat of formation

To determine the quantity, like heat of formation, we have used the Monte Carlo simulation to explore the configuration space of oxygen distribution using series expansion of energy functional. To determine the energy of each configuration of oxygen, various singlet, doublet (pairwise  $J_{ij}$ ), triplet (three-body  $J_{ijk}$ ), and quadruplet (four-body ( $J_{ijkl}$ )) clusters are used as shown in figure S2. The detailed algorithm of Monte Carlo simulation (Figure S7) contains the subroutine to compute the energy of the system with a given distribution of oxygen adsorbates. Calculation of energy of given configuration  $\sigma(i, j)$  requires the adsorbate-adsorbate interaction parameter, which can be derived from the set of equations S4 to S15 using DFT derived cluster energies.

The main program has two different loops to evaluate the quantities, like  $\Delta H_f$  and  $\theta_{eq}$ . The program systematically scans  $\theta$  to evaluate energy  $E(\theta)$ . The initial loop mainly evaluates the

energy cost to fill each and every lattice site by oxygen adsorbate for given  $\theta$ . In this loop, each and every site is filled by oxygen adsorbate to compute the energy to fill a particular lattice site. Later, this site is reset as an empty site.

In the final loop, a randomly lattice site is selected and filled by oxygen adsorbate. This final loop goes over a statistically large run. In each run, a randomly different site filled with oxygen adsorbate and energy and a lattice site is stored if subsequent runs lead to an energetically more stable configuration. The final loop determines the energetically favourable configuration for given  $\theta$ . At last, the final loop finishes by updating the lattice configuration corresponding to an energetically favourable lattice site. At the end, quantities like  $E(\sigma)$  and  $\Delta H_f(\sigma)$  are determined corresponding to given  $\theta$ . This program again restarts with new  $\theta$  after resetting quantities like  $E(i, j)$ , and  $E_{\min}$ . This program ends after reaching the condition of full oxygen coverage.

#### **Supplementary Note 4: Zero-point energy calculation using mass weighted hessian matrix**

To calculate the Gibbs free energy of hydrogen adsorption or any other adsorbate includes the calculation of the change in zero-point energy for the adsorbate. Zero-point energy of adsorbate in gas phase can be calculated by phonon calculation using vibrational modes associated with gas molecules. But over the surface of the catalyst, the entire phonon calculation could become computationally costly and more complex. Hence, we have manually computed the required block of hessian matrix to calculate the associated vibrational modes of adsorbate over the surface of the catalyst. In this method, we consider the catalyst surface as static and only compute the hessian corresponding to adsorbate via the finite difference method. In relation to the total energy of the system, the second derivative can be defined as,

$$k_{ij} = \left( \frac{\partial^2 E}{\partial q_i \partial q_j} \right) \quad [S13]$$

Harmonic vibrational frequencies  $\{v_i\}$  of an adsorbate or a molecule over the surface can be evaluated using,

$$v_i = \left( \frac{\lambda_i^{1/2}}{2\pi} \right) \quad [S14]$$

Here,  $\lambda_i$  are eigenvalues corresponding to the mass-weighted Hessian matrix ( $\mathbf{K}'$ ),

$$\mathbf{K}'_{ij} = \frac{1}{\sqrt{m_i m_j}} k_{ij} \quad [\text{S15}]$$

By diagonalization of a mass weighted Hessian matrix, one can compute the eigenvalues of the Hessian matrix to evaluate the vibrational modes of an adsorbate or a molecule over a catalyst surface. In this method, we actually compute a sub-block of the Hessian matrix<sup>1</sup> and from that, one can compute the zero-point energy of an adsorbate or a molecule over the surface of the catalyst. Apart from zero-point energy calculation, partial Hessian vibrational analysis can be conducted to determine the stable equilibrium of the adsorbate over a specific site of the catalyst.

### **Supplementary Note 5: Additional Computational details**

In order to initially screen the  $\text{M}_3\text{C}_2$  MXene, hydrogen evolution reaction (HER) activity was determined for pristine as well as -F and -O terminated MXenes. To consider the effect of hydrogen coverage, two different hydrogen coverages were used during the calculation of hydrogen adsorption energy.  $2 \times 2 \times 1$  supercell and unitcell were used for low hydrogen coverage ( $\theta=1/4$ ) and high hydrogen coverage ( $\theta=1$ ), respectively. Wave function cutoff, charge density cutoff, k-mesh, and vacuum are consistent, as mentioned in the main manuscript.

### **References**

1. Li, H. and Jensen, J.H., 2002. Partial Hessian vibrational analysis: the localization of the molecular vibrational energy and entropy. *Theoretical Chemistry Accounts*, **107**, pp.211-219.

## Supplementary Figures

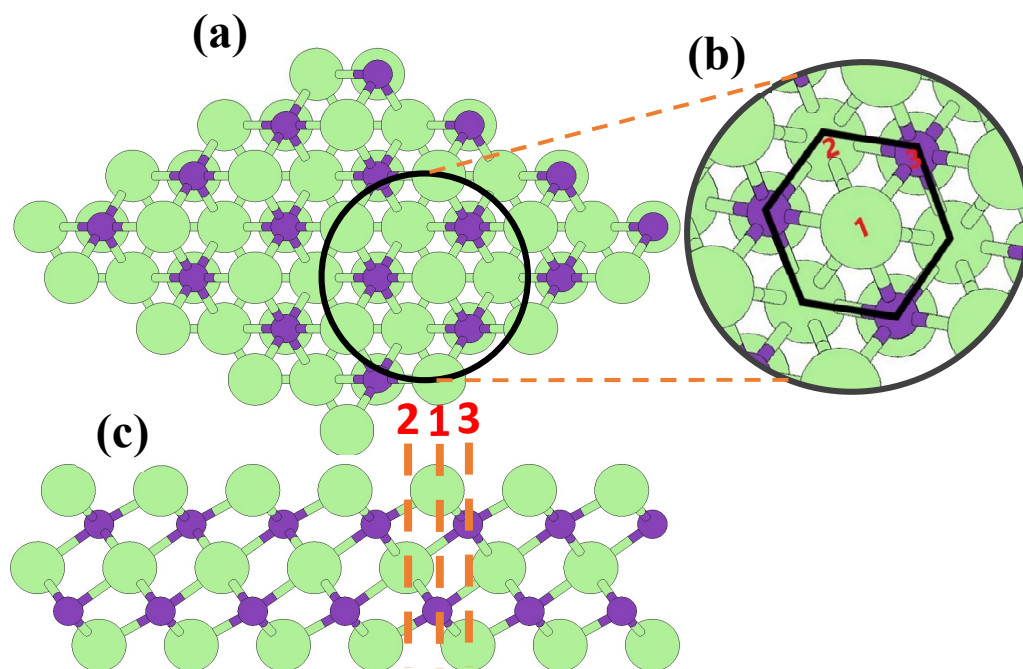

Figure S1 Schematic Diagram of (a) top view of  $M_3C_2$  MXene, (b) Pop up shows the possible sites for the placement of the termination groups (1) on-top site (2) fcc site (3) hcp site; (c) side view of  $M_3C_2$  MXene [here, green colour atom is early transition metal atom and purple colour atom is carbon.]

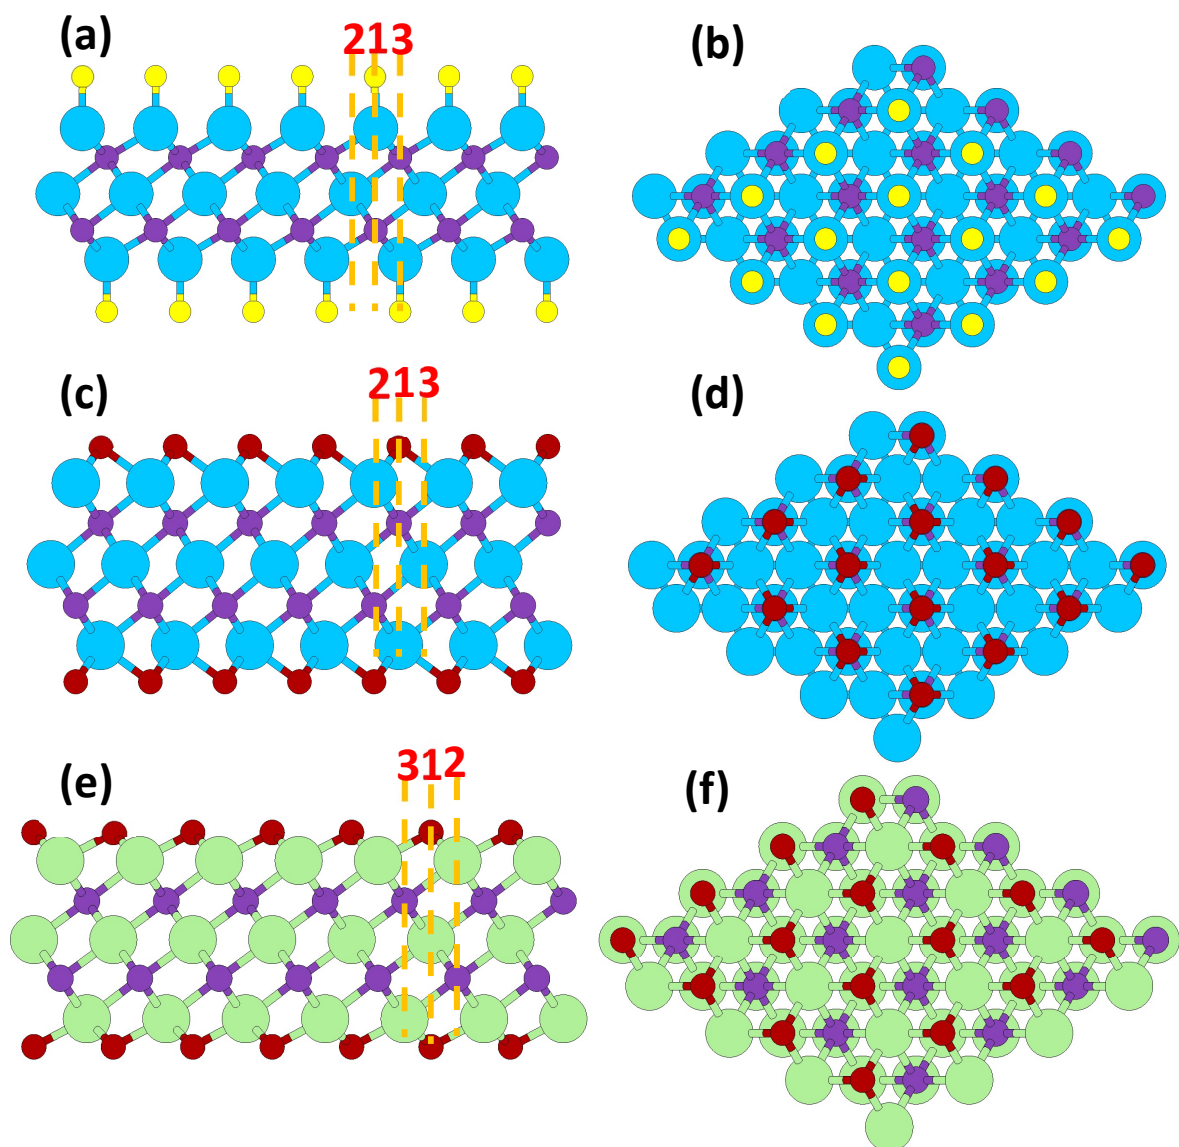

Figure S2 2D Schematic Diagram of  $\text{Mo}_3\text{C}_2\text{F}_2$  with (a) side view (b) top view;  $\text{Mo}_3\text{C}_2\text{O}_2$  with (c) side view (d) top view;  $\text{Ti}_3\text{C}_2\text{O}_2$  with (e) side view (f) top view [sky blue, light green, purple, red, yellow are Mo, Ti, C, O, F, respectively].



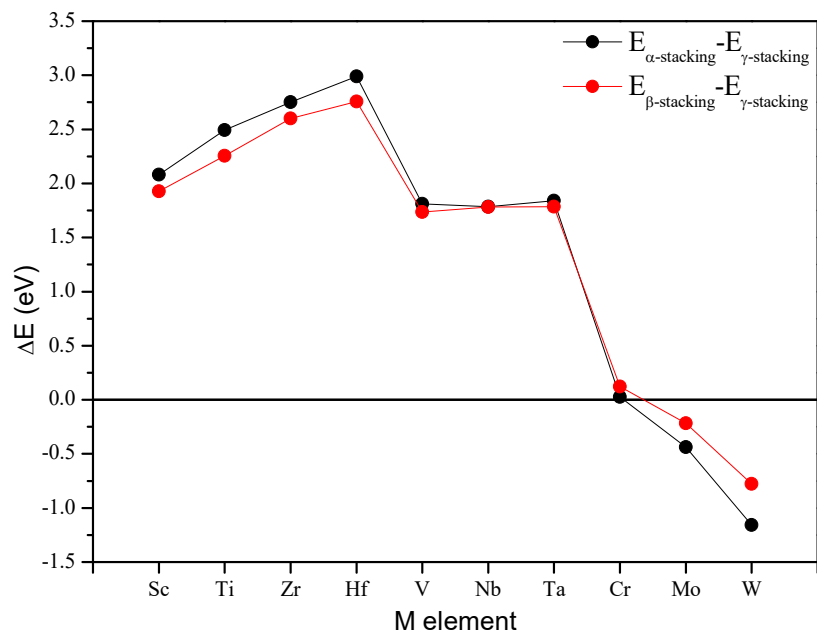

Figure S3 Comparative stacking energy of different stackings for early transition-metal based  $M_3C_2$  MXenes.

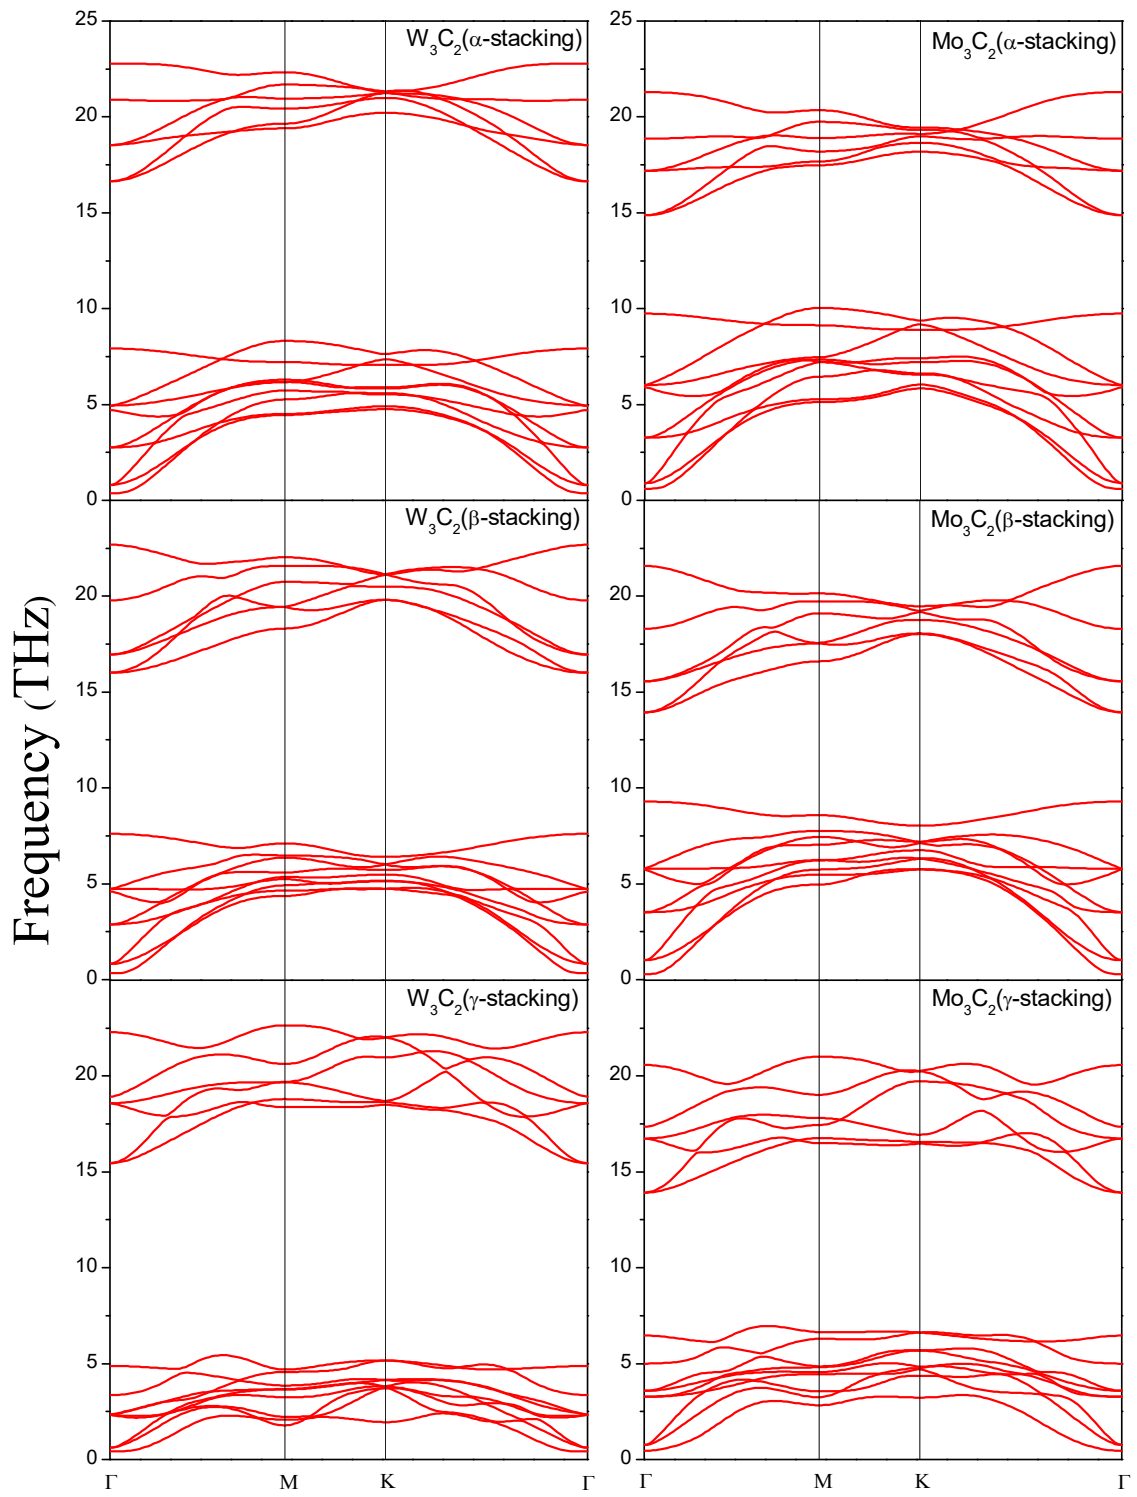

Figure S4: Phonon dispersion of three different stackings of pristine  $W_3C_2$  and  $Mo_3C_2$  MXenes.

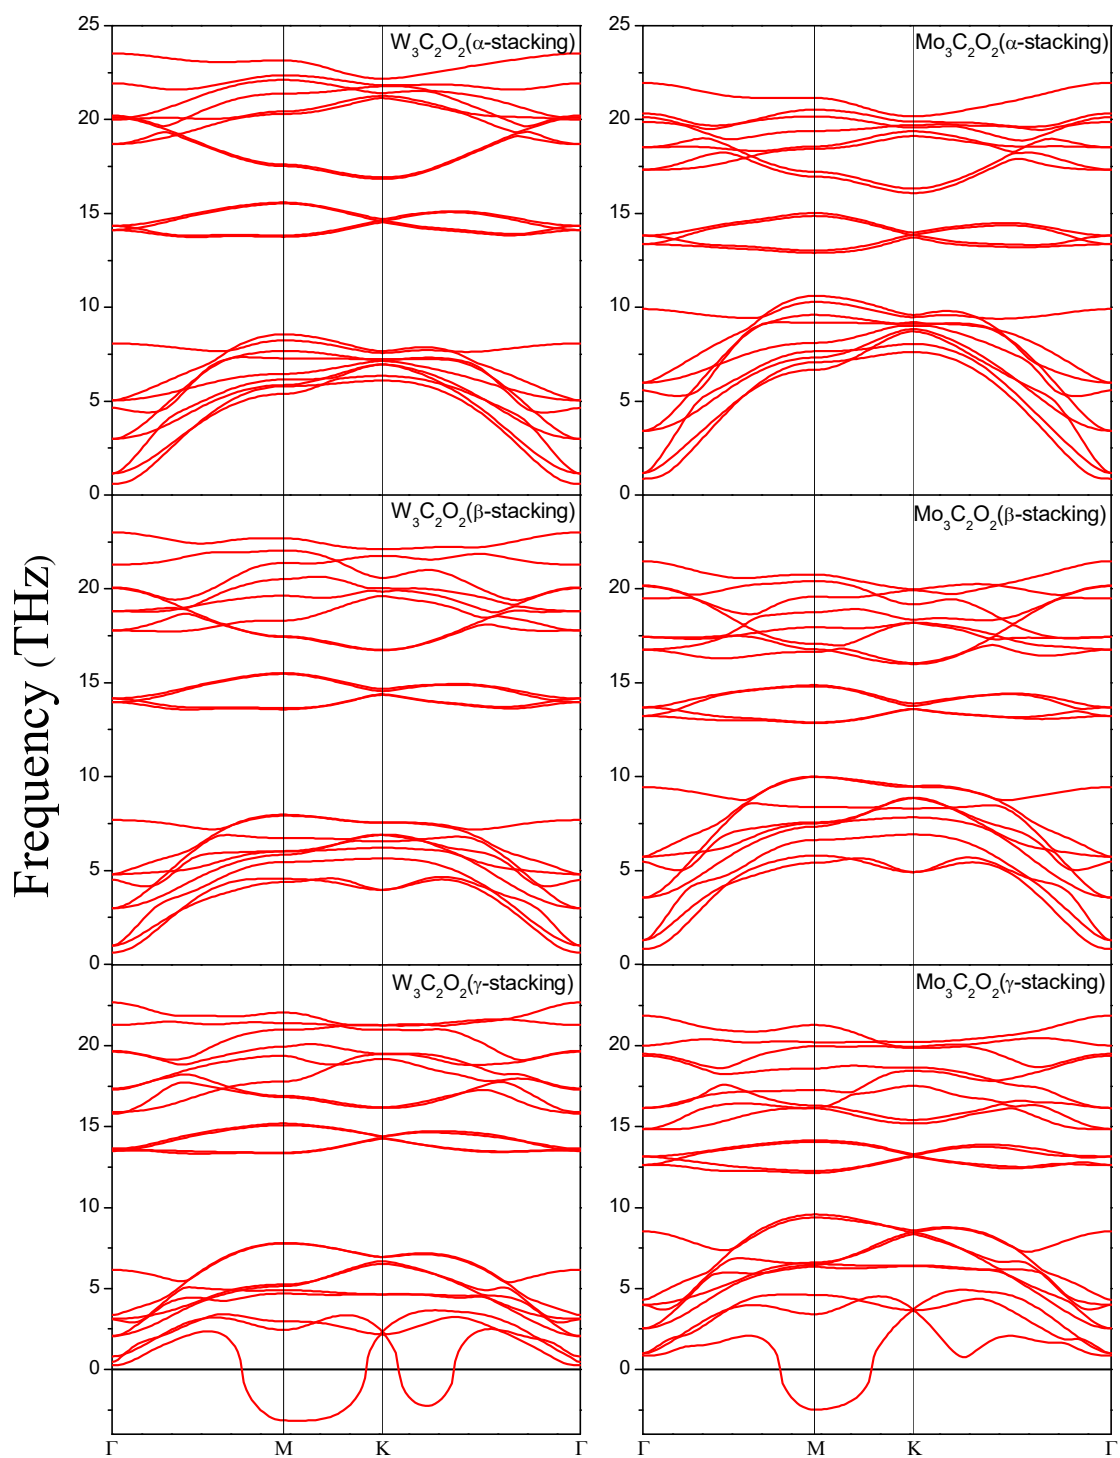

Figure S5: Phonon dispersion of three different stackings of pristine  $W_3C_2O_2$  and  $Mo_3C_2O_2$  MXenes.

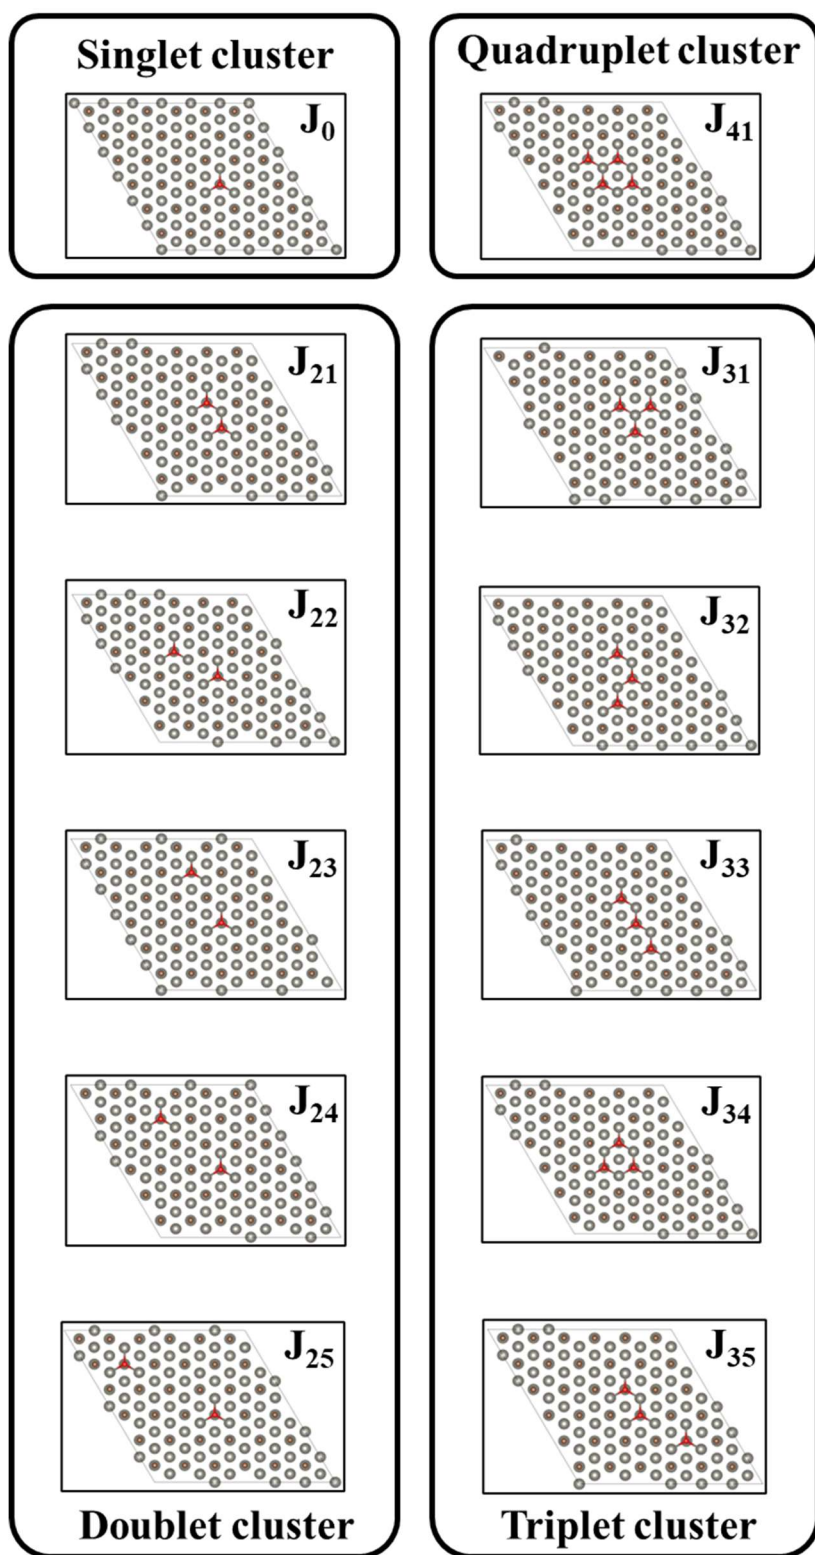

Figure S6: Considered singlet, doublet (pairwise  $J_{ij}$ ), triplet (three-body  $J_{ijk}$ ), and quadruplet (four-body ( $J_{ijkl}$ )) clusters for adsorbate-adsorbate interaction parameters for oxygen over the surface of MXene.

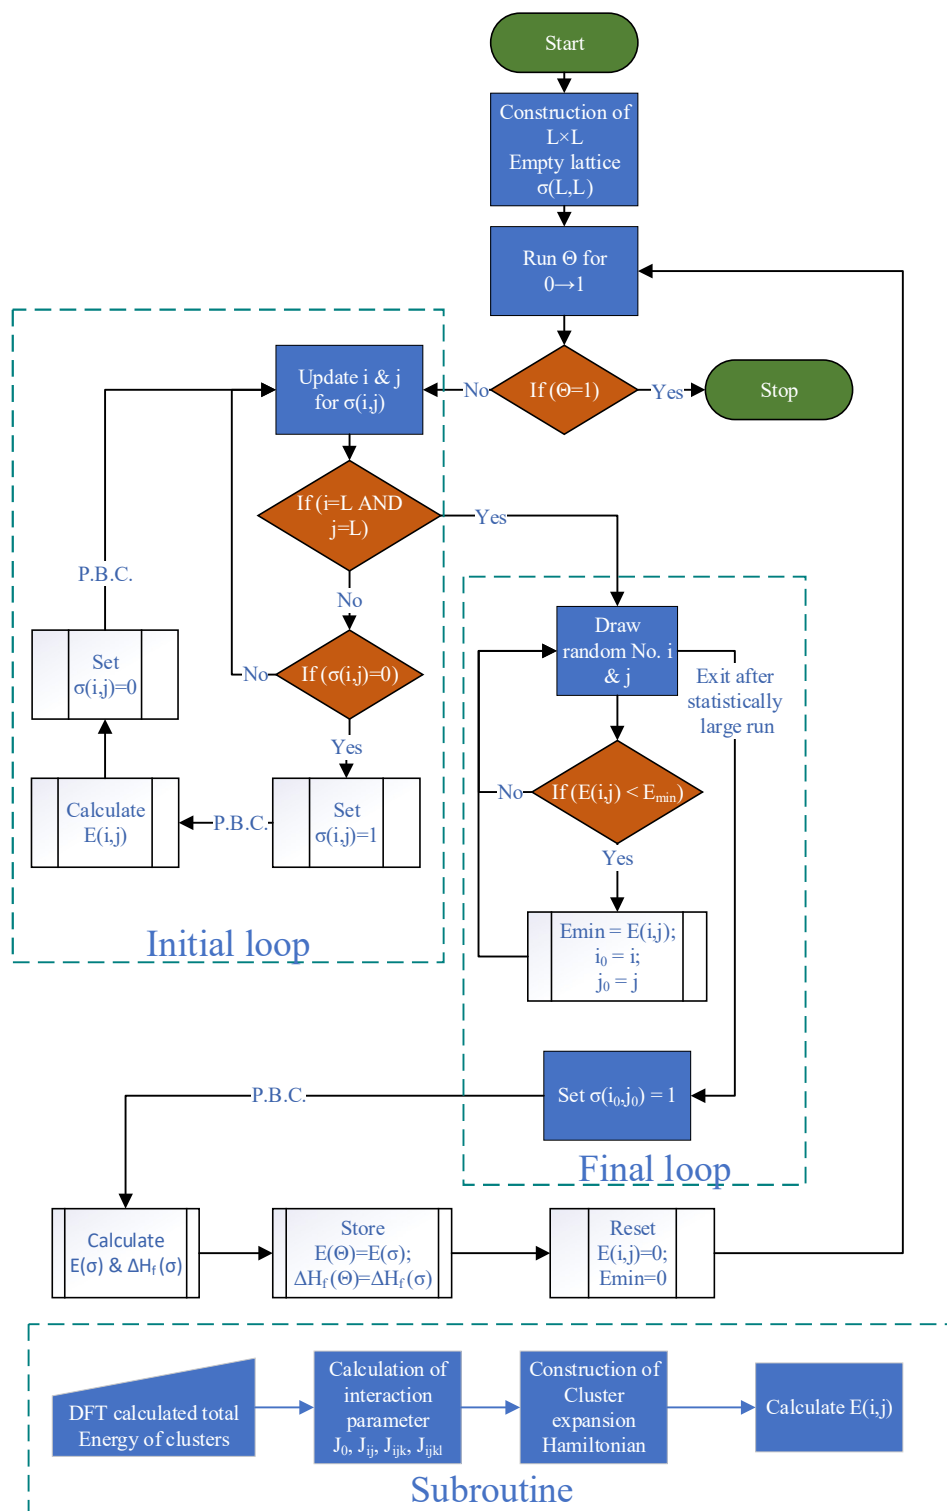

Figure S7: Algorithm to compute the Heat of formation ( $\Delta H_f$ ) using interaction parameters derived via density functional calculation. [Here,  $\Theta$  is adsorbate coverage, and  $\sigma(i,j)$  defines the lattice sites. P.B.C. refers to periodic boundary condition.]

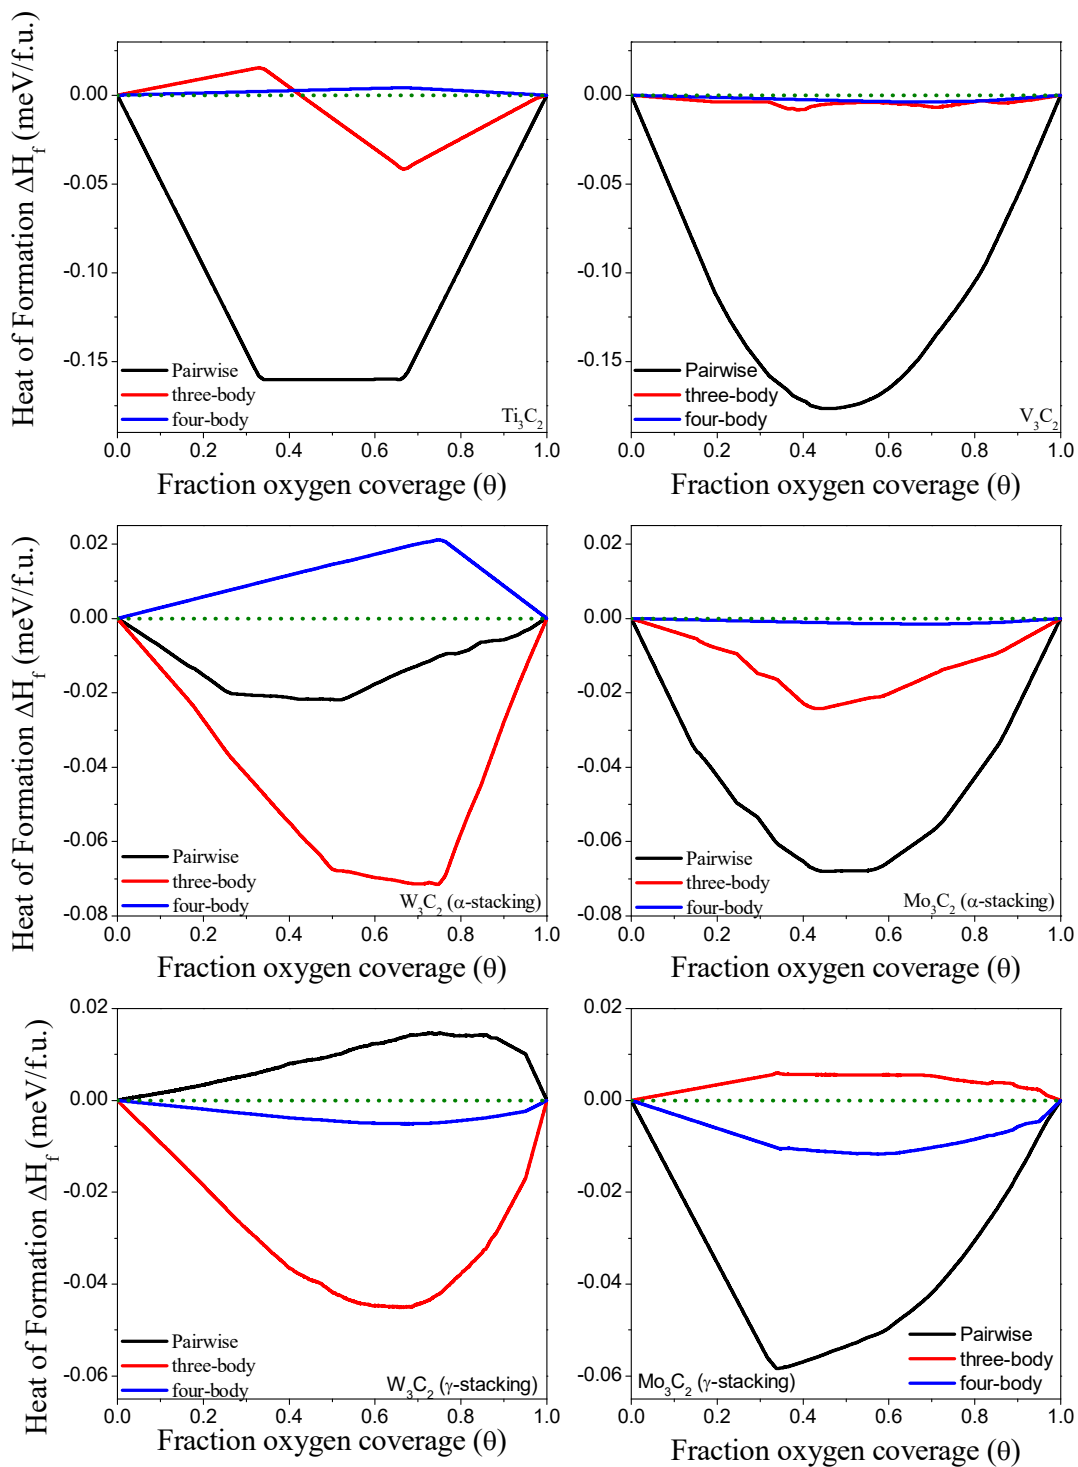

Figure S8: Distribution of Heat of formation in its pairwise, three-body, and four-body components with fractional oxygen coverage over surface of pristine MXene [calculated using interactive lattice simulation with  $80 \times 80$  lattice of MXene.]

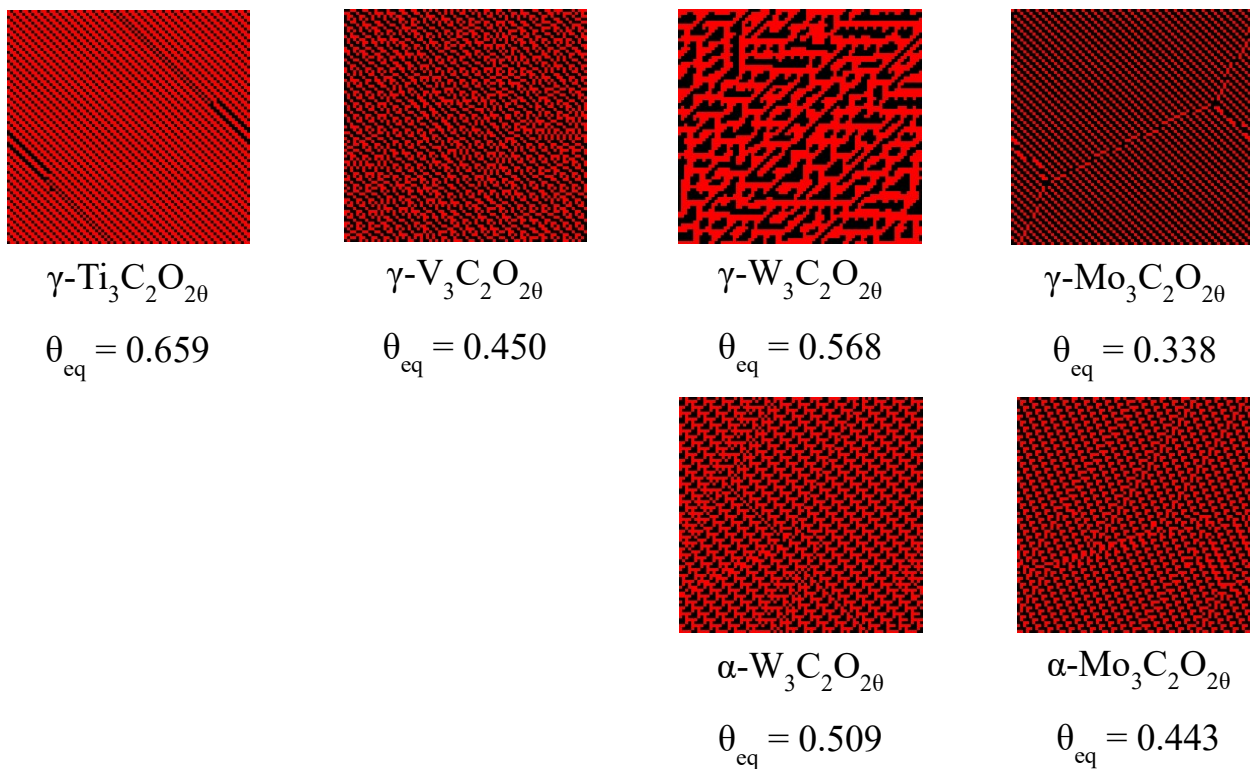

Figure S9: Calculated surface configuration oxygen over MXene at equilibrium coverage. [Here, the black colour surface is a suitable lattice site for oxygen termination, and the red dot indicates the presence of oxygen at the lattice site. For  $\text{Ti}_3\text{C}_2\text{O}_{20}$  and  $\text{V}_3\text{C}_2\text{O}_{20}$ , a suitable lattice site refers to the fcc site, while for  $\text{W}_3\text{C}_2\text{O}_{20}$  and  $\text{Mo}_3\text{C}_2\text{O}_{20}$ , it indicates the hcp site.]

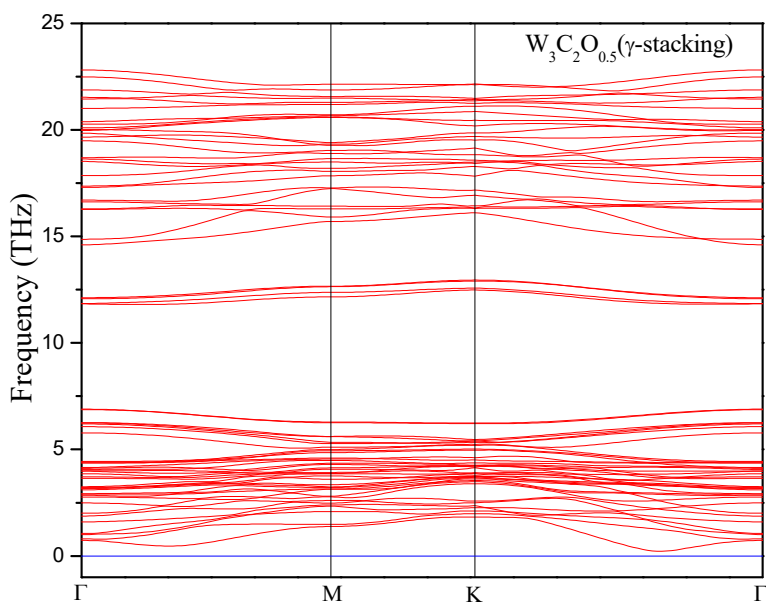

Figure S10 Phonon dispersion of  $\gamma$ -stackings of  $\text{W}_3\text{C}_2\text{O}_{0.5}$  MXenes.

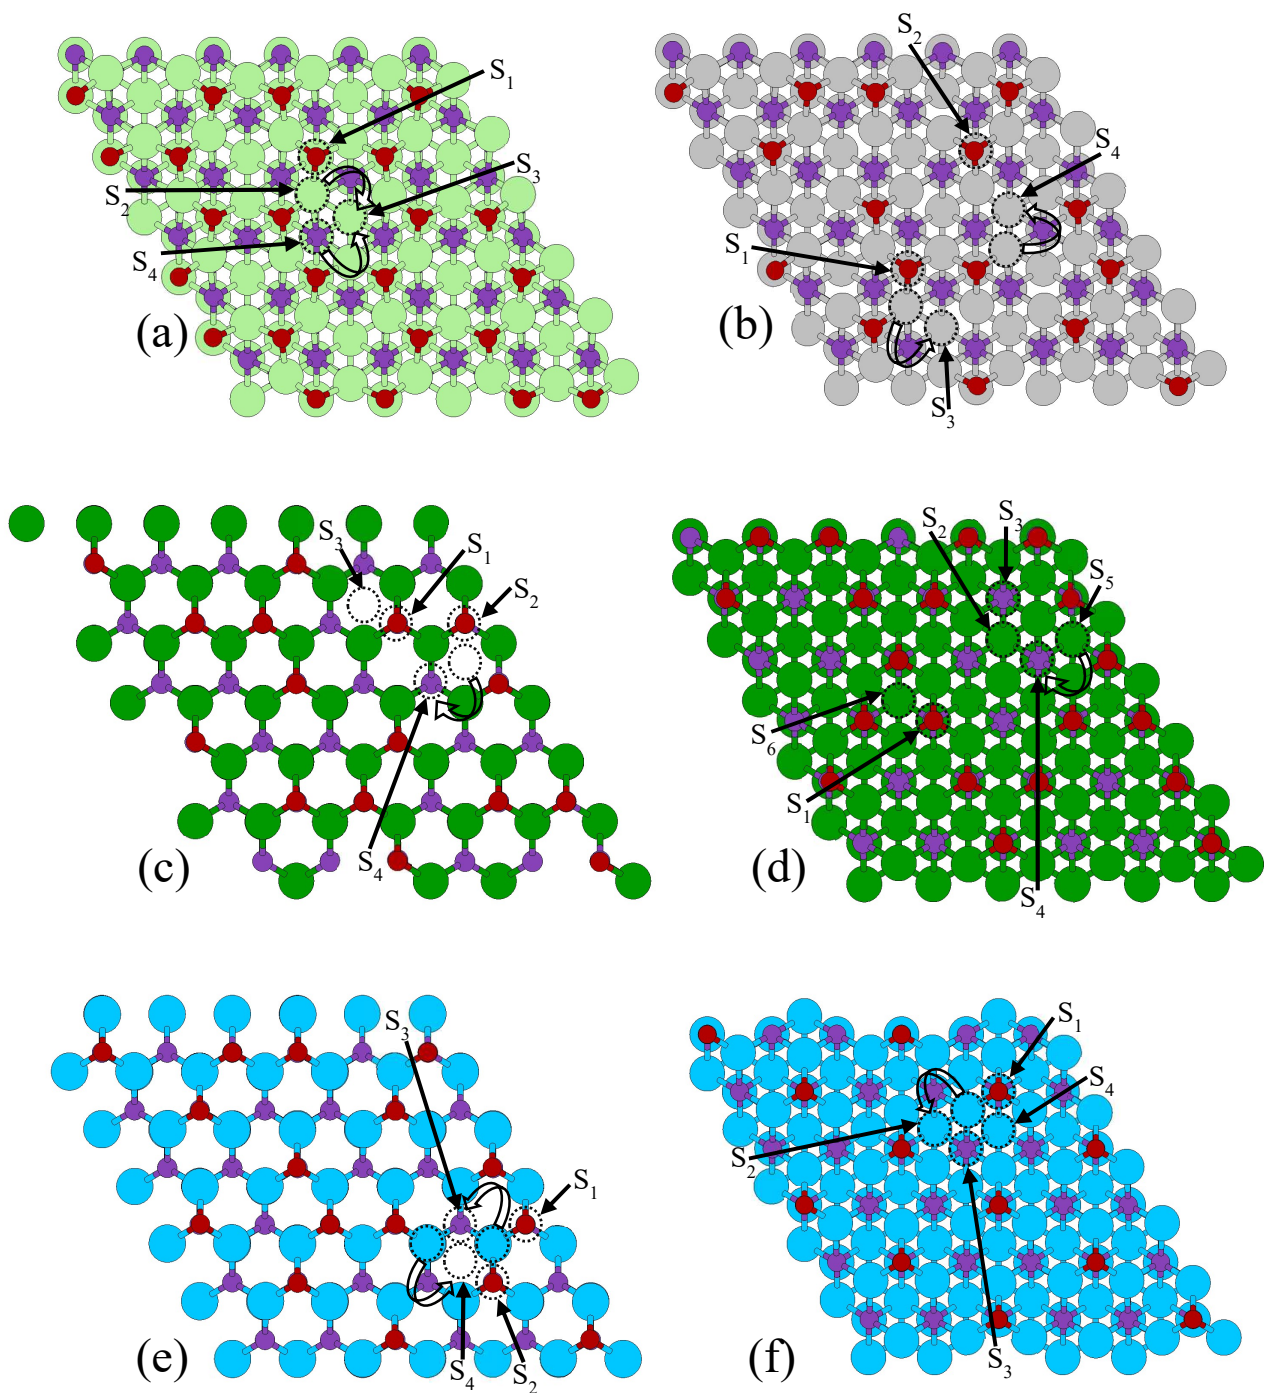

Figure S11: Final optimized structure of MXene with equilibrium oxygen coverage derived from lattice model along with different HER sites. [Actual calculation is performed over the 3×3 supercell of MXene. To properly understand the symmetry of oxygen configuration 6×6 supercell is shown above. Here, Light green, grey, green, sky blue, violet, and red represents Ti, V, W, Mo, C, and O atoms, respectively.]



## Supplementary Tables

Table S1: Total energy and lattice parameter of  $\gamma$ -stacking type MXenes with different placement of -F and -O termination groups. [Here, blue, green, and orange represent fcc, hcp, and the on-top site as energetically favourable sites for termination groups, as also verified via minimum energy depicted in bold letters.]

| Early transition metal group | MXene        | Lattice Parameter 'a' of pristine MXene (Å) | Placement of termination group | $T_x = -O$ termination  |                     | $T_x = -F$ termination  |                     |
|------------------------------|--------------|---------------------------------------------|--------------------------------|-------------------------|---------------------|-------------------------|---------------------|
|                              |              |                                             |                                | Lattice parameter a (Å) | Total Energy E (eV) | Lattice parameter a (Å) | Total Energy E (eV) |
| 3                            | $Sc_3C_2T_x$ | 3.359                                       | top site ( $T_t$ )             | 3.342                   | -5173.114           | 3.379                   | -5637.548           |
|                              |              |                                             | hcp ( $T_h$ )                  | 3.405                   | -5180.093           | 3.194                   | -5639.130           |
|                              |              |                                             | fcc ( $T_f$ )                  | <b>3.268</b>            | <b>-5180.418</b>    | <b>3.239</b>            | <b>-5640.359</b>    |
| 4                            | $Ti_3C_2T_x$ | 3.081                                       | top site ( $T_t$ )             | 3.198                   | -6069.671           | 3.157                   | -6531.086           |
|                              |              |                                             | hcp ( $T_h$ )                  | 3.004                   | -6073.256           | 3.005                   | -6531.957           |
|                              |              |                                             | fcc ( $T_f$ )                  | <b>3.028</b>            | <b>-6074.767</b>    | <b>3.061</b>            | <b>-6532.687</b>    |
|                              | $Zr_3C_2T_x$ | 3.326                                       | top site ( $T_t$ )             | 3.464                   | -5239.092           | 3.400                   | -5700.991           |
|                              |              |                                             | hcp ( $T_h$ )                  | 3.256                   | -5243.892           | 3.255                   | -5702.403           |
|                              |              |                                             | fcc ( $T_f$ )                  | <b>3.297</b>            | <b>-5245.572</b>    | <b>3.320</b>            | <b>-5702.942</b>    |
| $Hf_3C_2T_x$                 | 3.257        | top site ( $T_t$ )                          | 3.411                          | -6279.120               | 3.346               | -6741.231               |                     |
|                              |              | hcp ( $T_h$ )                               | 3.196                          | -6284.475               | 3.200               | -6742.253               |                     |
|                              |              | fcc ( $T_f$ )                               | <b>3.240</b>                   | <b>-6286.412</b>        | <b>3.265</b>        | <b>-6742.836</b>        |                     |
| 5                            | $V_3C_2T_x$  | 2.937                                       | top site ( $T_t$ )             | 3.086                   | -7122.245           | 3.025                   | -7581.496           |
|                              |              |                                             | hcp ( $T_h$ )                  | 2.853                   | -7123.629           | <b>2.846</b>            | <b>-7582.136</b>    |
|                              |              |                                             | fcc ( $T_f$ )                  | <b>2.905</b>            | <b>-7124.252</b>    | 2.956                   | -7581.991           |
|                              | $Nb_3C_2T_x$ | 3.131                                       | top site ( $T_t$ )             | 3.299                   | -5999.529           | 3.203                   | -6458.914           |
|                              |              |                                             | hcp ( $T_h$ )                  | 3.073                   | -6002.157           | <b>3.062</b>            | <b>-6459.973</b>    |
|                              |              |                                             | fcc ( $T_f$ )                  | <b>3.141</b>            | <b>-6002.668</b>    | 3.098                   | -6459.387           |
| $Ta_3C_2T_x$                 | 3.094        | top site ( $T_t$ )                          | 3.270                          | -6908.073               | 3.154               | -7367.705               |                     |
|                              |              | hcp ( $T_h$ )                               | 3.055                          | -6911.345               | <b>3.041</b>        | <b>-7368.260</b>        |                     |
|                              |              | fcc ( $T_f$ )                               | <b>3.123</b>                   | <b>-6911.867</b>        | 3.073               | -7367.539               |                     |
| 6                            | $Cr_3C_2T_x$ | 2.820                                       | top site ( $T_t$ )             | 3.016                   | -8321.096           | <b>2.953</b>            | <b>-8780.214</b>    |
|                              |              |                                             | hcp ( $T_h$ )                  | 2.728                   | -8322.390           | 2.811                   | -8780.018           |
|                              |              |                                             | fcc ( $T_f$ )                  | <b>2.867</b>            | <b>-8322.471</b>    | 2.879                   | -8779.982           |
|                              | $Mo_3C_2T_x$ | 3.007                                       | top site ( $T_t$ )             | 3.167                   | -6872.953           | <b>3.094</b>            | <b>-7332.050</b>    |
|                              |              |                                             | hcp ( $T_h$ )                  | <b>2.911</b>            | <b>-6875.253</b>    | 2.998                   | -7331.812           |
|                              |              |                                             | fcc ( $T_f$ )                  | 3.053                   | -6874.135           | 3.044                   | -7331.757           |
| $W_3C_2T_x$                  | 2.989        | top site ( $T_t$ )                          | 3.092                          | -7677.793               | <b>3.035</b>        | <b>-8136.950</b>        |                     |
|                              |              | hcp ( $T_h$ )                               | <b>2.904</b>                   | <b>-7680.440</b>        | 2.994               | -8135.946               |                     |
|                              |              | fcc ( $T_f$ )                               | 3.069                          | -7679.176               | 3.037               | -8135.817               |                     |

Table S2: Hydrogen adsorption energy for  $M_3C_2T_x$  MXenes with/without termination groups for low hydrogen coverage ( $\theta = 1/4$ ) and high hydrogen coverage ( $\theta = 1$ ). [Here, blue, green, and orange represent fcc, hcp, and the on-top site as energetically favourable sites for termination groups.]

| Early transition metal group | MXene                                         | Termination group | Adsorption energy E for hydrogen coverage $\theta = 1/4$ (eV) |                |                | Adsorption energy E for hydrogen coverage $\theta = 1$ (eV) |                |                |
|------------------------------|-----------------------------------------------|-------------------|---------------------------------------------------------------|----------------|----------------|-------------------------------------------------------------|----------------|----------------|
|                              |                                               |                   | S <sub>1</sub>                                                | S <sub>2</sub> | S <sub>3</sub> | S <sub>1</sub>                                              | S <sub>2</sub> | S <sub>3</sub> |
| 3                            | Sc <sub>3</sub> C <sub>2</sub> T <sub>x</sub> | pristine          | -0.049                                                        | -0.655         | -0.977         | 0.653                                                       | -0.361         | -0.825         |
|                              |                                               | -O                | -                                                             | -              | -1.087         | -                                                           | -0.452         | -0.760         |
|                              |                                               | -F                | 2.810                                                         | -0.478         | -              | -                                                           | -              | -              |
| 4                            | Ti <sub>3</sub> C <sub>2</sub> T <sub>x</sub> | pristine          | 0.042                                                         | -0.965         | -1.280         | 0.235                                                       | -0.933         | -1.275         |
|                              |                                               | -O                | 2.481                                                         | -              | -0.435         | -                                                           | -              | 0.096          |
|                              |                                               | -F                | 1.949                                                         | -              | -              | -                                                           | -              | -              |
|                              | Zr <sub>3</sub> C <sub>2</sub> T <sub>x</sub> | pristine          | 0.225                                                         | -0.991         | -1.286         | 0.287                                                       | -1.078         | -1.385         |
|                              |                                               | -O                | 2.431                                                         | -              | -0.047         | 2.520                                                       | -              | 0.423          |
|                              |                                               | -F                | 1.260                                                         | 0.640          | -              | 2.068                                                       | 1.529          | -              |
|                              | Hf <sub>3</sub> C <sub>2</sub> T <sub>x</sub> | pristine          | 0.190                                                         | -1.057         | -1.433         | 0.181                                                       | -1.142         | -1.474         |
|                              |                                               | -O                | 2.438                                                         | -              | 0.293          | -                                                           | -              | 0.800          |
|                              |                                               | -F                | 0.804                                                         | 0.304          | -              | 1.879                                                       | 1.477          | -              |
| 5                            | V <sub>3</sub> C <sub>2</sub> T <sub>x</sub>  | pristine          | -0.13                                                         | -0.857         | -1.074         | 0.11                                                        | -0.773         | -1.001         |
|                              |                                               | -O                | 0.848                                                         | -              | -0.689         | -                                                           | -              | -0.007         |
|                              |                                               | -F                | -                                                             | 1.567          | -              | -                                                           | -              | -              |
|                              | Nb <sub>3</sub> C <sub>2</sub> T <sub>x</sub> | pristine          | -0.02                                                         | -1.056         | -1.219         | 0.13                                                        | -1.038         | -1.19          |
|                              |                                               | -O                | 1.163                                                         | -              | 0.048          | 1.729                                                       | -              | 0.467          |
|                              |                                               | -F                | 1.77                                                          | -              | 0.757          | -                                                           | -              | -              |
|                              | Ta <sub>3</sub> C <sub>2</sub> T <sub>x</sub> | pristine          | -0.061                                                        | -1.187         | -1.332         | 0.003                                                       | -1.116         | -1.26          |
|                              |                                               | -O                | 1.015                                                         | -              | 0.485          | 1.6                                                         | -              | 0.872          |
|                              |                                               | -F                | 1.154                                                         | -              | 0.389          | -                                                           | -              | -              |
| 6                            | Cr <sub>3</sub> C <sub>2</sub> T <sub>x</sub> | pristine          | -0.563                                                        | -0.801         | -0.863         | -0.155                                                      | -0.514         | -0.774         |
|                              |                                               | -O                | -                                                             | -              | -0.581         | -                                                           | -0.264         | -0.181         |
|                              |                                               | -F                | -                                                             | -              | -              | -                                                           | -              | -              |
|                              | Mo <sub>3</sub> C <sub>2</sub> T <sub>x</sub> | pristine          | -0.306                                                        | -0.636         | -0.817         | -0.251                                                      | -0.462         | -0.654         |
|                              |                                               | -O                | 1.622                                                         | -0.583         | 1.452          | -                                                           | 0.435          | -              |
|                              |                                               | -F                | 0.394                                                         | 0.542          | 0.55           | 1.116                                                       | 0.406          | -              |
|                              | W <sub>3</sub> C <sub>2</sub> T <sub>x</sub>  | pristine          | -0.426                                                        | -0.485         | -0.648         | -0.516                                                      | -0.335         | -0.532         |
|                              |                                               | -O                | 1.65                                                          | -0.318         | -              | -                                                           | 0.919          | -              |
|                              |                                               | -F                | 0.053                                                         | 0.018          | 0.053          | -                                                           | 0.209          | -              |

S<sub>1</sub>-over metal site; S<sub>2</sub>- over hcp site; S<sub>3</sub>-over fcc site. Missing data represents either H is not adsorbed over that site or it shifted to other site.

Table S3 Relative total energy for placement of -O termination group, lattice parameter, and thickness of studied MXenes.

| MXene                                         | Stacking Configuration | Placement of termination group (lower-upper) | Relative Total Energy (eV/f.u.) | Lattice Parameter a (Å) | Thickness d (Å) |
|-----------------------------------------------|------------------------|----------------------------------------------|---------------------------------|-------------------------|-----------------|
| W <sub>3</sub> C <sub>2</sub> O <sub>2</sub>  | α                      | <b>hcp-hcp</b>                               | <b>0.000</b>                    | <b>2.89</b>             | <b>8.11</b>     |
|                                               |                        | hcp-fcc                                      | 0.796                           | 2.90                    | 8.12            |
|                                               |                        | fcc-fcc                                      | 1.491                           | 2.91                    | 8.12            |
|                                               |                        | top-hcp                                      | 2.220                           | 2.92                    | 8.66            |
|                                               |                        | top-fcc                                      | 2.943                           | 2.93                    | 8.65            |
|                                               |                        | top-top                                      | 4.374                           | 2.96                    | 9.21            |
|                                               | β                      | <b>hcp-hcp</b>                               | <b>0.000</b>                    | <b>2.89</b>             | <b>8.14</b>     |
|                                               |                        | hcp-fcc                                      | 0.509                           | 2.90                    | 8.15            |
|                                               |                        | fcc-fcc                                      | 1.150                           | 2.90                    | 8.17            |
|                                               |                        | top-hcp                                      | 2.101                           | 2.92                    | 8.70            |
|                                               |                        | top-fcc                                      | 2.627                           | 2.93                    | 8.68            |
|                                               |                        | top-top                                      | 4.120                           | 2.96                    | 9.23            |
|                                               | γ                      | <b>hcp-hcp</b>                               | <b>0.000</b>                    | <b>2.90</b>             | <b>7.98</b>     |
|                                               |                        | hcp-fcc                                      | 0.791                           | 2.94                    | 7.84            |
|                                               |                        | fcc-fcc                                      | 1.263                           | 3.07                    | 7.14            |
|                                               |                        | top-hcp                                      | 1.434                           | 2.99                    | 8.17            |
|                                               |                        | top-fcc                                      | 1.998                           | 3.08                    | 7.80            |
|                                               |                        | top-top                                      | 2.646                           | 3.09                    | 8.48            |
| Mo <sub>3</sub> C <sub>2</sub> O <sub>2</sub> | α                      | <b>hcp-hcp</b>                               | <b>0.000</b>                    | <b>2.88</b>             | <b>8.04</b>     |
|                                               |                        | hcp-fcc                                      | 0.615                           | 2.89                    | 8.03            |
|                                               |                        | fcc-fcc                                      | 1.132                           | 2.90                    | 8.02            |
|                                               |                        | top-hcp                                      | 2.137                           | 2.91                    | 8.59            |
|                                               |                        | top-fcc                                      | 2.686                           | 2.93                    | 8.55            |
|                                               |                        | top-top                                      | 4.232                           | 2.95                    | 9.12            |
|                                               | β                      | <b>hcp-hcp</b>                               | <b>0.000</b>                    | <b>2.88</b>             | <b>8.08</b>     |
|                                               |                        | hcp-fcc                                      | 0.384                           | 2.89                    | 8.07            |
|                                               |                        | fcc-fcc                                      | 0.867                           | 2.89                    | 8.07            |
|                                               |                        | top-hcp                                      | 2.053                           | 2.91                    | 8.63            |
|                                               |                        | top-fcc                                      | 2.426                           | 2.92                    | 8.59            |
|                                               | γ                      | top-top                                      | 4.020                           | 2.95                    | 9.16            |
|                                               |                        | <b>hcp-hcp</b>                               | <b>0.000</b>                    | <b>2.91</b>             | <b>7.81</b>     |
|                                               |                        | hcp-fcc                                      | 0.652                           | 2.94                    | 7.70            |
|                                               |                        | fcc-fcc                                      | 1.118                           | 3.05                    | 7.13            |
| top-hcp                                       |                        | 1.277                                        | 3.00                            | 8.03                    |                 |
|                                               | top-fcc                | 1.757                                        | 3.07                            | 7.74                    |                 |
|                                               | top-top                | 2.300                                        | 3.17                            | 8.13                    |                 |

Table S4 Calculated change in zero-point energy and entropic correction between adsorbed and gas state over considered MXenes [‘Im’ signifies Imaginary vibration modes associated to hydrogen atom over catalytic site.]

| MXene                          | Stacking Configuration | Termination group | $\Delta ZPE$ (eV) |          |          | $\Delta ZPE - T\Delta S$ (eV) |          |          |
|--------------------------------|------------------------|-------------------|-------------------|----------|----------|-------------------------------|----------|----------|
|                                |                        |                   | top site          | hcp site | fcc site | top site                      | hcp site | fcc site |
| W <sub>3</sub> C <sub>2</sub>  | $\alpha$               | Pristine          | Im                | 0.043    | 0.063    | -                             | 0.248    | 0.268    |
|                                |                        | -O                | -                 | 0.168    | Im       | -                             | 0.373    | -        |
|                                | $\beta$                | Pristine          | Im                | 0.040    | 0.065    | -                             | 0.245    | 0.270    |
|                                |                        | -O                | -                 | 0.167    | -        | -                             | 0.372    | -        |
|                                | $\gamma$               | Pristine          | 0.024             | 0.000    | 0.022    | 0.229                         | 0.205    | 0.227    |
|                                |                        | -O                | 0.042             | 0.173    | -        | 0.247                         | 0.378    | -        |
| Mo <sub>3</sub> C <sub>2</sub> | $\alpha$               | Pristine          | Im                | 0.036    | 0.060    | -                             | 0.241    | 0.265    |
|                                |                        | -O                | Im                | 0.168    | -        | -                             | 0.373    | -        |
|                                | $\beta$                | Pristine          | Im                | 0.034    | 0.063    | -                             | 0.239    | 0.268    |
|                                |                        | -O                | -                 | 0.167    | -        | -                             | 0.372    | -        |
|                                | $\gamma$               | Pristine          | -0.002            | 0.002    | 0.025    | 0.203                         | 0.207    | 0.230    |
|                                |                        | -O                | Im                | 0.174    | Im       | -                             | 0.379    | -        |
| Ti <sub>3</sub> C <sub>2</sub> | $\gamma$               | Pristine          | Im                | 0.003    | 0.031    | -                             | 0.208    | 0.236    |
|                                |                        | -O                | -0.005            | -        | 0.166    | 0.200                         | -        | 0.371    |
| V <sub>3</sub> C <sub>2</sub>  | $\gamma$               | Pristine          | Im                | 0.019    | 0.044    | -                             | 0.224    | 0.249    |
|                                |                        | -O                | 0.043             | -        | 0.173    | 0.248                         | -        | 0.378    |

Table S5 Calculated change in Gibbs free energy of hydrogen and description of HER active site over studied MXene at equilibrium oxygen coverage, as shown in figure S11.

| MXene<br>( $M_3C_2O_{2(\theta)}$ )                            | Site           | $\Delta G_{H^*}$<br>(eV) | Initial Site          | Final Site            | Remarks                   |
|---------------------------------------------------------------|----------------|--------------------------|-----------------------|-----------------------|---------------------------|
| $\gamma$ -Ti <sub>3</sub> C <sub>2</sub> O <sub>2(0.66)</sub> | S <sub>1</sub> | 0.566                    | over oxygen (fcc)     | over oxygen (fcc)     | -                         |
|                                                               | S <sub>2</sub> | -0.155                   | over Ti (top)         | over fcc hollow (fcc) | migration of H            |
|                                                               | S <sub>3</sub> | -0.154                   | over fcc hollow (fcc) | over fcc hollow (fcc) | -                         |
|                                                               | S <sub>4</sub> | -0.154                   | over C (hcp)          | over fcc hollow (fcc) | migration of H            |
| $\gamma$ -V <sub>3</sub> C <sub>2</sub> O <sub>2(0.44)</sub>  | S <sub>1</sub> | 0.305                    | over oxygen (fcc)     | over oxygen (fcc)     | -                         |
|                                                               | S <sub>2</sub> | 0.518                    | over oxygen (fcc)     | over oxygen (fcc)     | -                         |
|                                                               | S <sub>3</sub> | -0.450                   | over V (top)          | over fcc hollow (fcc) | migration of H            |
|                                                               | S <sub>4</sub> | -0.619                   | over V (top)          | over fcc hollow (fcc) | migration of H            |
| $\alpha$ -W <sub>3</sub> C <sub>2</sub> O <sub>2(0.44)</sub>  | S <sub>1</sub> | 1.216                    | over oxygen (hcp)     | over oxygen (hcp)     | -                         |
|                                                               | S <sub>2</sub> | 0.668                    | over oxygen (hcp)     | over oxygen (hcp)     | -                         |
|                                                               | S <sub>3</sub> | -0.006                   | over fcc hollow (fcc) | over fcc hollow (fcc) | -                         |
|                                                               | S <sub>4</sub> | -0.615                   | over fcc hollow (fcc) | over C (hcp)          | migration of H            |
| $\gamma$ -W <sub>3</sub> C <sub>2</sub> O <sub>2(0.55)</sub>  | S <sub>1</sub> | 0.638                    | over oxygen (hcp)     | over oxygen (hcp)     | -                         |
|                                                               | S <sub>2</sub> | -0.375                   | over fcc hollow (fcc) | over fcc hollow (fcc) | -                         |
|                                                               | S <sub>3</sub> | -0.242                   | over C (hcp)          | over C (hcp)          | -                         |
|                                                               | S <sub>4</sub> | -0.269                   | over C (hcp)          | over C (hcp)          | -                         |
|                                                               | S <sub>5</sub> | -0.268                   | over fcc hollow (fcc) | over C (hcp)          | migration of H            |
|                                                               | S <sub>6</sub> | 1.604                    | over fcc hollow (fcc) | over fcc hollow (fcc) | Absorption in first layer |
| $\alpha$ -Mo <sub>3</sub> C <sub>2</sub> O <sub>2(0.44)</sub> | S <sub>1</sub> | 0.496                    | over oxygen (hcp)     | over oxygen (hcp)     | -                         |
|                                                               | S <sub>2</sub> | 0.725                    | over oxygen (hcp)     | over oxygen (hcp)     | -                         |
|                                                               | S <sub>3</sub> | -0.567                   | over Mo (top)         | over C (hcp)          | migration of H            |
|                                                               | S <sub>4</sub> | 0.023                    | over Mo (top)         | over fcc hollow (fcc) | migration of H            |
| $\gamma$ -Mo <sub>3</sub> C <sub>2</sub> O <sub>2(0.33)</sub> | S <sub>1</sub> | 0.646                    | over oxygen (hcp)     | over oxygen (hcp)     | -                         |
|                                                               | S <sub>2</sub> | 0.064                    | over Mo (top)         | over fcc hollow (fcc) | migration of H            |
|                                                               | S <sub>3</sub> | -0.231                   | over C (hcp)          | over C (hcp)          | -                         |
|                                                               | S <sub>4</sub> | 0.065                    | over fcc hollow (fcc) | over fcc hollow (fcc) | -                         |

## Supplementary Multimedia

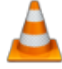

Multimedia 1.mp4

Multimedia S1: Changes in surface configuration of MXene with change in oxygen coverage from  $\Theta=0$  to  $\Theta=1$  [Here, the black colour surface is a suitable lattice site for oxygen termination, and the red dot indicates the presence of oxygen at the lattice site. For  $\text{Ti}_3\text{C}_2$  and  $\text{V}_3\text{C}_2$ , a suitable lattice site refers to the fcc site, while for  $\text{W}_3\text{C}_2$  and  $\text{Mo}_3\text{C}_2$ , it indicates the hcp site.]
